# Supplementary material
Source: ML conference proceedings conference paper supplement (https://openaccess.thecvf.com/content/ICCV2023/html/Hu_TIFA_Accurate_and_ICCV_2023_paper.html)
Supplement: Supplementary file 1 [file Hu_TIFA_Accurate_and_ICCV_2023_supplemental.pdf]

# Appendices

## A. Qualitative Examples

Here we show three examples on how TIFA is computed. For each text input, we show the questions and answers generated by GPT-3 [3] and filtered by UnifiedQA [25]. We also show the VQA model’s answer to each vision question given each generated image. The VQA model used is mPLUG [31]. The first text input comes from COCO [34] and the second and third text inputs come from DrawBench [47].

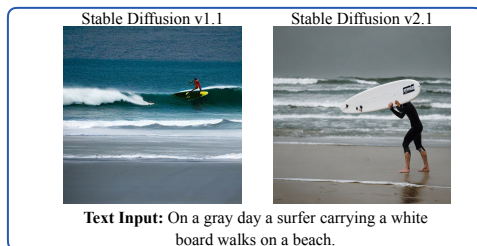

| GPT-3 generated + verified QAs                                                                                                    |                                                              |
|-----------------------------------------------------------------------------------------------------------------------------------|--------------------------------------------------------------|
| Question: is this a surfer?<br>Choices: yes, no<br>VQA: Yes <input checked="" type="checkbox"/>                                   | Answer: yes<br>Yes <input checked="" type="checkbox"/>       |
| Question: who is on the beach?<br>Choices: surfer, swimmer, driver, skier<br>VQA: Surfer <input checked="" type="checkbox"/>      | Answer: surfer<br>Surfer <input checked="" type="checkbox"/> |
| Question: is the person carrying a board?<br>Choices: yes, no<br>VQA: Yes <input checked="" type="checkbox"/>                     | Answer: yes<br>Yes <input checked="" type="checkbox"/>       |
| Question: is this a beach?<br>Choices: yes, no<br>VQA: Yes <input checked="" type="checkbox"/>                                    | Answer: yes<br>Yes <input checked="" type="checkbox"/>       |
| Question: what type of place is this?<br>Choices: beach, park, forest, mountain<br>VQA: Beach <input checked="" type="checkbox"/> | Answer: beach<br>Beach <input checked="" type="checkbox"/>   |
| Question: is the surfer carrying something?<br>Choices: yes, no<br>VQA: Yes <input checked="" type="checkbox"/>                   | Answer: yes<br>Yes <input checked="" type="checkbox"/>       |
| Question: is the surfer walking on the beach?<br>Choices: yes, no<br>VQA: No <input checked="" type="checkbox"/>                  | Answer: yes<br>Yes <input checked="" type="checkbox"/>       |
| Question: is the day gray?<br>Choices: yes, no<br>VQA: No <input checked="" type="checkbox"/>                                     | Answer: yes<br>Yes <input checked="" type="checkbox"/>       |
| Question: what color is the sky?<br>Choices: black, gray, red, blue<br>VQA: Blue <input checked="" type="checkbox"/>              | Answer: gray<br>Gray <input checked="" type="checkbox"/>     |
| Question: is the board white?<br>Choices: yes, no<br>VQA: No <input checked="" type="checkbox"/>                                  | Answer: yes<br>Yes <input checked="" type="checkbox"/>       |
| Question: what color is the board?<br>Choices: black, white, red, blue<br>VQA: Black <input checked="" type="checkbox"/>          | Answer: white<br>White <input checked="" type="checkbox"/>   |
| Accuracy on 12 questions: 54.6 (left) 100.0 (right)                                                                               |                                                              |

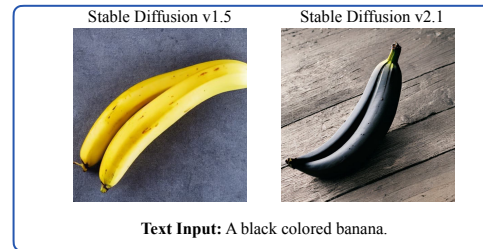

| GPT-3 generated + verified QAs                                                                                               |                                                            |
|------------------------------------------------------------------------------------------------------------------------------|------------------------------------------------------------|
| Question: is this a banana?<br>Choices: yes, no<br>VQA: Yes <input checked="" type="checkbox"/>                              | Answer: yes<br>Yes <input checked="" type="checkbox"/>     |
| Question: is the banana black?<br>Choices: yes, no<br>VQA: No <input checked="" type="checkbox"/>                            | Answer: surfer<br>Yes <input checked="" type="checkbox"/>  |
| Question: what color is the banana?<br>Choices: yellow, red, black, white<br>VQA: Yellow <input checked="" type="checkbox"/> | Answer: black<br>Black <input checked="" type="checkbox"/> |
| Accuracy on 3 questions: 33.3 (left) 100.0 (right)                                                                           |                                                            |

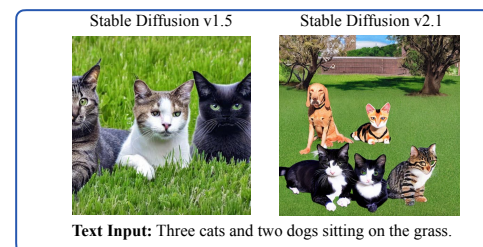

| GPT-3 generated + verified QAs                                                                                                      |                                                            |
|-------------------------------------------------------------------------------------------------------------------------------------|------------------------------------------------------------|
| Question: are there cats?<br>Choices: yes, no<br>VQA: Yes <input checked="" type="checkbox"/>                                       | Answer: yes<br>Yes <input checked="" type="checkbox"/>     |
| Question: are there dogs?<br>Choices: yes, no<br>VQA: No <input checked="" type="checkbox"/>                                        | Answer: yes<br>Yes <input checked="" type="checkbox"/>     |
| Question: is there grass?<br>Choices: yes, no<br>VQA: Yes <input checked="" type="checkbox"/>                                       | Answer: yes<br>Yes <input checked="" type="checkbox"/>     |
| Question: what are the animals sitting on?<br>Choices: grass, leaves, twigs, sand<br>VQA: Grass <input checked="" type="checkbox"/> | Answer: grass<br>Grass <input checked="" type="checkbox"/> |
| Question: are the animals sitting?<br>Choices: yes, no<br>VQA: Yes <input checked="" type="checkbox"/>                              | Answer: yes<br>Yes <input checked="" type="checkbox"/>     |
| Question: how many cats are in the picture?<br>Choices: 1, 2, 3, 4<br>VQA: 3 <input checked="" type="checkbox"/>                    | Answer: 3<br>4 <input checked="" type="checkbox"/>         |
| Question: are there two dogs?<br>Choices: yes, no<br>VQA: No <input checked="" type="checkbox"/>                                    | Answer: yes<br>No <input checked="" type="checkbox"/>      |
| Question: how many dogs are in the picture?<br>Choices: 1, 2, 3, 4<br>VQA: 1 <input checked="" type="checkbox"/>                    | Answer: 2<br>1 <input checked="" type="checkbox"/>         |
| Accuracy on 8 questions: 62.5 (left) 62.5 (right)                                                                                   |                                                            |

Table 4. Detailed evaluation of each text-to-image model on TIFA v1.0.

|                           | VQA Accuracy by Element Category |             |             |             |             |             |             |             |
|---------------------------|----------------------------------|-------------|-------------|-------------|-------------|-------------|-------------|-------------|
|                           | shape                            | other       | counting    | spatial     | attribute   | activity    | food        | object      |
| AttnGAN[60]               | 42.0                             | 47.8        | 41.9        | 70.8        | 53.6        | 64.3        | 48.1        | 56.3        |
| X-LXMERT[5]               | 34.8                             | 46.8        | 41.7        | 70.9        | 55.2        | 65.4        | 52.4        | 57.0        |
| Stable Diffusion v1.1[46] | 66.7                             | 68.7        | 66.0        | 69.4        | 74.6        | 73.8        | 79.7        | 75.1        |
| VQ-Diffusion[16]          | 63.8                             | 64.2        | 61.6        | 73.5        | 75.4        | 76.7        | 80.0        | 74.2        |
| Stable Diffusion v1.5[46] | 65.2                             | 72.1        | 66.6        | 72.9        | 78.0        | 76.9        | 81.4        | 78.4        |
| minDALL-E[27]             | <b>69.6</b>                      | <b>74.6</b> | 69.0        | 74.7        | 77.0        | 79.5        | <b>82.8</b> | 79.9        |
| Stable Diffusion v2.1[46] | 66.7                             | 72.1        | <b>73.3</b> | <b>76.1</b> | <b>78.8</b> | <b>82.0</b> | 82.2        | <b>82.4</b> |

|                           | TIFA by text source |             |              |             | Overall TIFA |             |             |
|---------------------------|---------------------|-------------|--------------|-------------|--------------|-------------|-------------|
|                           | location            | color       | animal/human | material    |              | COCO        | free-form   |
| AttnGAN[60]               | 60.4                | 56.5        | 58.6         | 61.7        | 67.5         | 47.4        | 58.1        |
| X-LXMERT[5]               | 69.1                | 54.8        | 52.8         | 61.2        | 68.1         | 47.7        | 58.6        |
| Stable Diffusion v1.1[46] | 78.4                | 75.7        | 78.2         | 80.4        | 79.3         | 72.2        | 75.7        |
| VQ-Diffusion[16]          | 77.9                | <b>84.2</b> | 79.0         | 80.9        | 79.8         | 72.6        | 76.2        |
| Stable Diffusion v1.5[46] | 79.9                | 78.8        | 80.6         | 84.7        | 81.9         | 74.9        | 78.4        |
| minDALL-E[27]             | 82.1                | 83.7        | 78.9         | 86.1        | 83.5         | 75.5        | 79.4        |
| Stable Diffusion v2.1[46] | <b>82.8</b>         | 83.6        | <b>85.2</b>  | <b>88.5</b> | <b>86.3</b>  | <b>77.7</b> | <b>82.0</b> |

## B. Detailed Results

Table 4 shows the detailed evaluation results of the text-to-image models we use on the TIFA v1.0 benchmark. We show the VQA accuracy of each question category, TIFA score on each text source, and the overall TIFA score. We can see that Stable Diffusion v2.1 [46] gets the highest overall score and also scores the highest in most categories. Nonetheless, the CLIP [42] and VQGAN [9] based minDALL-E [27] gets the highest accuracy on “shape”, “other”, “food”, and VQ-Diffusion [16] gets the highest accuracy on “color”.

## C. Annotation Details

### C.1. Likert Scale on Text-to-Image Faithfulness

**Guidelines** The annotation guideline is as follows:

- On a scale of 1-5, score "does the image match the prompt?".
- The ranking of each image given the same text input is important. If you believe the current scoring criteria cannot reflect your ranking preference, pick scores that are consistent with your ranking. Ties are allowed.
- To evaluate the generated image, there are two aspects: image quality and text-image match. Here we only care about text-image match, which is referred to as “faithfulness”.
- There are several kinds of elements in the text: object, attribute, relation, and context. Measure the consistency by counting how many elements are missed/misrepresented in the generated image.

- For some elements, e.g. “train conductor’s hat”, if you can see there is a hat but not a train conductor’s hat, consider half of the element is missed/misrepresented in the generated image.
- Objects are the most important elements. If an object is missing, then consider all related attributes, activity, and attributes missing.
- When you cannot tell what the object/attribute/activity/context is, consider the element missing. (e.g., can’t tell if an object is a microwave)

Given the above guideline, suppose the text input contains  $n$  elements, and  $x$  elements are missed or misrepresented.  $n$  and  $x$  are all counted by the annotators. The reference scoring guideline is as follows:

- 5: The image perfectly matches the prompt.
- 4:  $x \leq 2$  and  $x \leq n/3$ . A few elements are missed/misrepresented.
- 3:  $\min\{2, n/3\} < x \leq n/2$  elements are missed/misrepresented.
- 2:  $x > n/2$ . More than half of the elements are missed/misrepresented.
- 1: None of the major objects are correctly presented in the image.

**Details** We collect 1600 annotations on 800 generated images from 160 text inputs. Each image is scored by 2 annotators, and we collect the scores from 20 graduate students. We

average the scores as the final faithfulness score of the image. The inter-annotator agreement measured by Krippendorff’s  $\alpha$  is 0.67, indicating “substantial” agreement. The images are generated by the five most recent text-to-image models in our study, including VQ-Diffusion [16], minDALL-E [27], and Stable Diffusion [47] v1.1, v1.5, and v2.1. For each text input, we present the five images together, making it easier for the annotators to give faithfulness scores that reflect their ranking preference. We will release the annotation scores on publication.

### C.2. Human VQA

**Guidelines** Given an image, a question, and a set of choices, choose the correct choice according to the image content. There are two types of questions. One has two options: "(A) yes (B) no". Another type of question has four choices. We also add the fifth option “None of the above”. If you believe none of the four choices is correct, choose the fifth one. Some images are of low quality. Just select the choice according to your instinct. For ambiguous cases, for example, the question is “is there a man?”, and the image contains a human but it is unclear whether the human is a man, answer “no”.

**Details** We collect annotations of 1029 questions on 126 generated images. The images are from images used in the Likert Scale annotation. Each question is answered by two annotators, and we have the same 20 graduate students as the annotators. The inter-annotator agreement measured by Krippendorff’s  $\alpha$  is 0.88. A third annotator is involved if the two annotators disagree. And the final answer is given by the majority vote. We will release the annotated VQA answers.

### D. Common Q & A

**Any possible extension to TIFA?** As discussed in §1, one extension of our work will be customized versions of the TIFA benchmark focusing on one aspect of image generation. For example, we can make a TIFA benchmark that only contains questions about “counting”; Or a benchmark consists of text inputs synthesized to test text-to-image models’ ability in composing multiple objects. Another possible extension is to use TIFA on other generation tasks, e.g., text-to-3D and text-to-video.

**The OpenAI APIs are too expensive. Can we generate questions by local models?** Yes. Our approach works on any language model. Please refer to §4.3 on question generation with our fine-tuned LLaMA 2 checkpoint in. Also, we would like to emphasize that all questions in TIFA v1.0 benchmark are pre-generated by GPT-3, and there is no need to re-generate those questions for evaluation.

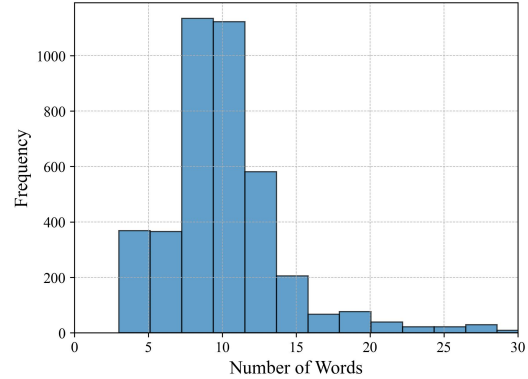

Figure 12. Distribution of the lengths of TIFA v1.0 text inputs.

**More details on TIFA v1.0 text inputs?** The distribution of the number of words in the text inputs is shown in 12. Most text inputs have around 10 words. We also conduct bias analysis on TIFA v1.0 text inputs. Among the 4K text inputs, regarding gender expression, 400 are perceived as “male” and 239 are perceived as “female”. We find that the bias in gender distribution comes from captions sampled from COCO dataset [34].

### E. Text-to-Image Model Details

**AttnGAN** AttnGAN [60] is a text-to-image model that is introduced in 2017. It is based on an attention mechanism that allows the model to focus on different parts of the input text when generating an image. AttnGAN has been shown to generate high-quality images for a variety of datasets and has been widely used in a number of applications. However, the attention mechanism can be computationally expensive, and the model can be difficult to train.

**X-LXMERT** X-LXMERT [5] is an enhanced version of LXMERT [53]. It is introduced in 2020 and incorporates several training refinements. These refinements involve discretizing visual representations, utilizing uniform masking with a wide range of masking ratios, and aligning appropriate pre-training datasets to respective objectives.

**minDALL-E** MinDALL-E [27] is a fast, minimal port of Boris Dayma’s DALL-E Mini (with mega weights). DALL-E Mini is an attempt to reproduce OpenAI’s DALL-E [44] with a smaller architecture. DALL-E can generate high-quality new images from any text prompt. The checkpoint we use is DALL-E Mega, the latest version of DALL-E Mini.

**VQ-Diffusion** VQ-Diffusion [16] is a generative model that combines vector quantization (VQ) and diffusion-based models for image synthesis. VQ-Diffusion builds upon the framework of diffusion-based generative models, which involves simulating a stochastic process that gradually trans-

forms a simple noise distribution into the target data distribution. In VQ-Diffusion, the image data is first quantized into discrete codes using a VQ algorithm, which maps each image patch to the nearest code in a codebook. This allows the model to represent complex data distributions with a compact set of discrete codes, rather than continuous probability densities.

**Stable Diffusion** Stable Diffusion is a pre-trained diffusion model for text-to-image generation. It is based on Latent Diffusion model (LDM) [46]. LDM is designed to learn the underlying structure of a dataset by mapping it to a lower-dimensional latent space. This latent space represents the data in which the relationships between different data points are more easily understood and analyzed, and reduces the amount of computational resources needed for training diffusion models. Specifically, we use three versions of Stable Diffusion, v1.1, v1.5, and v2.1. Each version is trained with a different number of steps and amount of data.

## F. Prompt

For demonstration purposes, we show part of the prompt for question generation with GPT-3 in-context learning. The whole prompt will be released with our codes. The prompt contains instructions and several in-context examples. The examples cover all element categories.

Given an image description, generate multiple-choice questions that verify if the image description is correct.

First extract elements from the image description. Then classify each element into a category (object, human, animal, food, activity, attribute, counting, color, material, spatial, location, shape, other).

Finally, generate questions for each element.

Description: A man posing for a selfie in a jacket and bow tie.

Entities: man, selfie, jacket, bow tie

Activities: posing

Colors:

Counting:

Other attributes:

Questions and answers are below:

About man (human):

Q: is this a man?

Choices: yes, no

A: yes

Q: who is posing for a selfie?

Choices: man, woman, boy, girl

A: man

About selfie (activity):

Q: is the man taking a selfie?

Choices: yes, no

A: yes

Q: what type of photo is the person taking?

Choices: selfie, landscape, sports, portrait

A: selfie

About jacket (object):

Q: is the man wearing a jacket?

Choices: yes, no

A: yes

Q: what is the man wearing?

Choices: jacket, t-shirt, tuxedo, sweater

A: jacket

About bow tie (object):

Q: is the man wearing a bow tie?

Choices: yes, no

A: yes

Q: is the man wearing a bow tie or a neck tie?

Choices: bow tie, neck tie, cravat, bolo tie

A: bow tie

About posing (activity):

Q: is the man posing for the selfie?

Choices: yes, no

A: yes

Q: what is the man doing besides taking the selfie?

Choices: posing, waving, nothing, shaking

A: posing

Description: A horse and several cows feed on hay.

Entities: horse, cows, hay

Activities: feed on

Colors:

Counting: several

Other attributes:

Questions and answers are below:

About horse (animal):

Q: is there a horse?

Choices: yes, no

A: yes

About cows (animal):

Q: are there cows?

Choices: yes, no

A: yes

About hay (object):

Q: is there hay?

Choices: yes, no

A: yes

Q: what is the horse and cows feeding on?

Choices: hay, grass, leaves, twigs

A: hay

About feed on (activity):

Q: are the horse and cows feeding on hay?

Choices: yes, no

A: yes

About several (counting):  
Q: are there several cows?  
Choices: yes, no  
A: yes

Description: A red colored dog.  
Entities: dog  
Activities:  
Colors: red  
Counting:  
Other attributes:  
Questions and answers are below:  
About dog (animal):  
Q: is this a dog?  
Choices: yes, no  
A: yes  
Q: what animal is in the picture?  
Choices: dog, cat, bird, fish  
A: dog  
About red (color):  
Q: is the dog red?  
Choices: yes, no  
A: yes  
Q: what color is the dog?  
Choices: red, black, white, yellow  
A: red

Description: Here are motorcyclists parked outside a Polish gathering spot for women  
Entities: motorcyclists, gathering spot, women  
Activities: parked  
Colors:  
Counting:  
Other attributes: outside, polish  
Questions and answers are below:  
About motorcyclists (human):  
Q: are there motorcyclists?  
Choices: yes, no  
A: yes  
About gathering spot (location):  
Q: is this a gathering spot?  
Choices: yes, no  
A: yes  
About women (human):  
Q: are there women?  
Choices: yes, no  
A: yes  
Q: who are in the gathering spot?  
Choices: women, men, boys, girls  
A: women  
About parked (activity):  
Q: are the motorcyclists parked?  
Choices: yes, no  
A: yes  
About outside (spatial):  
Q: have the motorcyclists parked outside the gathering spot?

Choices: yes, no  
A: yes  
Q: are the motorcyclists outside or inside of the gathering spot?  
Choices: outside, inside, on the roof, in the basement  
A: outside  
About Polish (other):  
Q: is this a Polish gathering spot?  
Choices: yes, no  
A: yes  
Q: is this a Polish or a Chinese gathering spot?  
Choices: Polish, American, Chinese, Japanese  
A: Polish
